# Supplementary material for: Explanation for the Multi-Component Scintillation of Cerium Fluoride Through the Equilibrium and Photophysical Investigation of Cerium(III)-Fluoro Complexes
Source: MDPI journal article supplement (doi:10.3390/nano9101462), 2019-10-15
Supplement: s1 [file s1]

## Supplementary Information

for

# Explanation for the Multi-Component Scintillation of Cerium Fluoride Through the Equilibrium and Photophysical Investigation of Cerium(III)-Fluoro Complexes

Zsolt Valicsek <sup>1</sup>, Máté Kovács <sup>2,†</sup> and Ottó Horváth <sup>1,\*</sup>

<sup>1</sup> Department of General and Inorganic Chemistry, Faculty of Engineering, University of Pannonia, Egyetem u. 10, H-8200 Veszprém, Hungary; valicsek@almos.uni-pannon.hu (Z.V.)

<sup>2</sup> Department of Analytical Chemistry, Faculty of Engineering, University of Pannonia, Egyetem u. 10, H-8200 Veszprém, Hungary; mate.kovacs@richter.hu (M.K.)

\* Correspondence: horvath.otto@mk.uni-pannon.hu; Tel.: +36-88-624-000 / 6049 ext.

† Present affiliation: Gedeon Richter Plc. Research Analytical Department, Gyömrői út 19-21, H-1103 Budapest

---

| Content                | Page Nr. |
|------------------------|----------|
| Figure S1, Tables S1-2 | 2        |
| Tables S3-5            | 3        |
| Figure S2              | 4        |

---

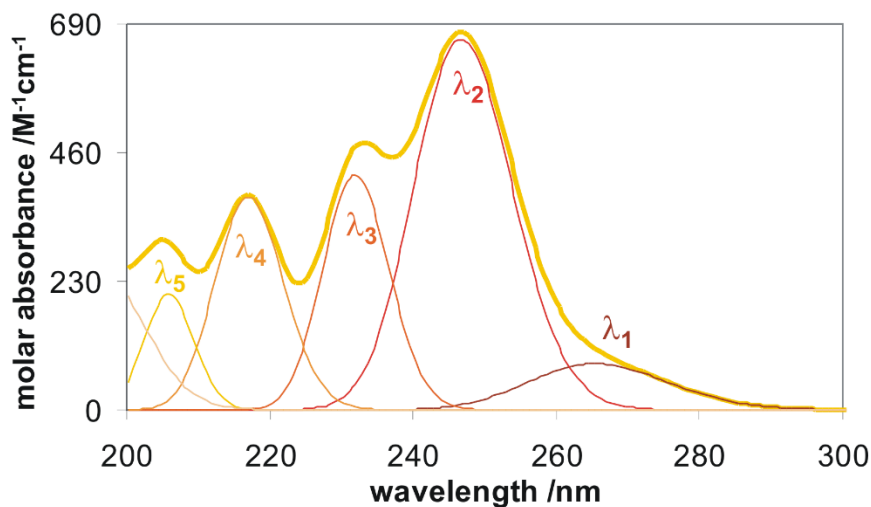

Figure S1. Analysis of the absorption spectrum of  $[\text{CeF}_3(\text{H}_2\text{O})_6]$ .

Table S1. Excitation bands of cerium(III)-fluoro complexes compared to the absorption ones from spectrum analysis.  $[\text{CeF}_x(\text{H}_2\text{O})_{9-x}]^{3-x}$  is abbreviated as  $[\text{CeF}_x]^{3-x}$ .

| complex         |            | $[\text{Ce}]^{3+}$ | $[\text{CeF}]^{2+}$ | $[\text{CeF}_2]^+$ | $[\text{CeF}_3]$ |
|-----------------|------------|--------------------|---------------------|--------------------|------------------|
| $\lambda_1$ /nm | absorption | 296                | 294                 | 290                | 265              |
|                 | excitation | 297                | 295                 | 287                | 264              |
| $\lambda_2$ /nm | absorption | 251                | 250                 | 248                | 247              |
|                 | excitation | 253                | 254                 | 249                | 247              |
| $\lambda_3$ /nm | absorption | 237                | 235                 | 233                | 232              |
|                 | excitation | 241                | 238                 | 230                | 231              |
| $\lambda_4$ /nm | absorption | 221                | 220                 | 218                | 217              |
|                 | excitation | -                  | -                   | 220                | 218              |
| $\lambda_5$ /nm | absorption | 210                | 209                 | 206                | 206              |
|                 | excitation | -                  | -                   | -                  | -                |

Table S2. Photophysical parameters for the cerium(III)-fluoride system, calculated by the method supposing equilibrium processes much slower than the photophysical ones.  $[\text{CeF}_x(\text{H}_2\text{O})_{9-x}]^{3-x}$  is abbreviated as  $[\text{CeF}_x]^{3-x}$ .

| complex                                | $[\text{Ce}]^{3+}$ | $[\text{CeF}]^{2+}$ | $[\text{CeF}_2]^+$ | $[\text{CeF}_3]$ |
|----------------------------------------|--------------------|---------------------|--------------------|------------------|
| $\Phi_r$                               | 0.987              | 0.784               | 0.658              | 0.387            |
| $\tau$ /ns                             | 49.0               | 44.5                | 36.6               | 13.8             |
| $k_r / 10^7 \text{ s}^{-1}$            | 2.01               | 1.76                | 1.80               | 2.80             |
| $k_{nr} / 10^7 \text{ s}^{-1}$         | 0.0255             | 0.486               | 0.934              | 4.44             |
| $\tau_0 = 1/k_r$ /ns                   | 49.7               | 56.7                | 55.6               | 35.7             |
| $k_d = 1/\tau$ / $10^7 \text{ s}^{-1}$ | 2.04               | 2.25                | 2.73               | 7.24             |

**Table S3.** Photophysical parameters for the cerium(III)-fluoride system, calculated by the method supposing equilibrium processes much faster than the photophysical ones.  $[\text{CeF}_x(\text{H}_2\text{O})_{9-x}]^{3-x}$  is abbreviated as  $[\text{CeF}_x]^{3-x}$ .

| complex                          | $[\text{Ce}]^{3+}$ | $[\text{CeF}]^{2+}$ | $[\text{CeF}_2]^+$ | $[\text{CeF}_3]$ |
|----------------------------------|--------------------|---------------------|--------------------|------------------|
| $\Phi_r$                         | 0.990              | 0.769               | 0.604              | 0.377            |
| $\tau/\text{ns}$                 | 49.1               | 44.2                | 32.2               | 10.9             |
| $k_r/10^7 \text{ s}^{-1}$        | 2.02               | 1.74                | 1.88               | 3.45             |
| $k_{nr}/10^7 \text{ s}^{-1}$     | 0.0204             | 0.523               | 1.23               | 5.71             |
| $\tau_0=1/k_r/\text{ns}$         | 49.6               | 57.4                | 53.2               | 29.0             |
| $k_d=1/\tau/10^7 \text{ s}^{-1}$ | 2.04               | 2.26                | 3.11               | 9.16             |

**Table S4.** Rate constants for fluorescence decay and excited-state equilibrium processes in the cerium(III)-fluoride system, calculated by the method supposing equilibrium processes much slower than the photophysical ones. Additionally, the excited-state stability constants are given.  $[\text{CeF}_x(\text{H}_2\text{O})_{9-x}]^{3-x}$  is abbreviated as  $[\text{CeF}_x]^{3-x}$ .

| complex             | $k_{d,i}/10^7 \text{ s}^{-1}$ | $^*k_{i+}/10^7 \text{ M}^{-1}\text{s}^{-1}$ | $^*k_{i-}/10^7 \text{ s}^{-1}$ | $\lg ^*K_i/\text{M}^{-1}$ |
|---------------------|-------------------------------|---------------------------------------------|--------------------------------|---------------------------|
| $[\text{Ce}]^{3+}$  | 2.05                          | —                                           | —                              | —                         |
| $[\text{CeF}]^{2+}$ | 2.21                          | 0.0392                                      | 0.0000000754                   | 5.72                      |
| $[\text{CeF}_2]^+$  | 5.58                          | 0.000561                                    | 2.91                           | -3.71                     |
| $[\text{CeF}_3]$    | 9.79                          | 2.11                                        | 0.0587                         | 1.56                      |

**Table S5.** Rate constants for fluorescence decay and excited-state equilibrium processes in the cerium(III)-fluoride system, calculated by the method supposing equilibrium processes are much faster than the photophysical ones. Additionally, the excited-state stability constants are given.  $[\text{CeF}_x(\text{H}_2\text{O})_{9-x}]^{3-x}$  is abbreviated as  $[\text{CeF}_x]^{3-x}$ .

| complex             | $k_{d,i}/10^7 \text{ s}^{-1}$ | $^*k_{i+}/10^7 \text{ M}^{-1}\text{s}^{-1}$ | $^*k_{i-}/10^7 \text{ s}^{-1}$ | $\lg ^*K_i/\text{M}^{-1}$ |
|---------------------|-------------------------------|---------------------------------------------|--------------------------------|---------------------------|
| $[\text{Ce}]^{3+}$  | 2.09                          | —                                           | —                              | —                         |
| $[\text{CeF}]^{2+}$ | 0.000741                      | 67600000                                    | 94500                          | 2.85                      |
| $[\text{CeF}_2]^+$  | 0.00560                       | 21600                                       | 34.5                           | 2.80                      |
| $[\text{CeF}_3]$    | 7.87                          | 199000000                                   | 3130                           | 4.80                      |

Comparing to the ground-state situation, in the case of the assumption of slower equilibrium processes, the monofluoro cerium(III) complex will be more and more dominant in the luminescence because the di- and trifluoro complexes decay much faster (Fig. S2a), besides,  $^*[\text{CeF}_2(\text{H}_2\text{O})_7]^+$  is very dissociative (compared to the ground-state complex). The decay rate constants of  $^*[\text{Ce}(\text{H}_2\text{O})_9]^{3+}$  and  $^*[\text{CeF}(\text{H}_2\text{O})_8]^{2+}$  are very close, hence, their emission decay curves must be almost parallel, even if it cannot be seen in Fig. S2a because of the very low fraction of  $^*[\text{Ce}(\text{H}_2\text{O})_9]^{3+}$ . Due to the slow equilibrium processes, the concentration of the free fluoride remains constant.

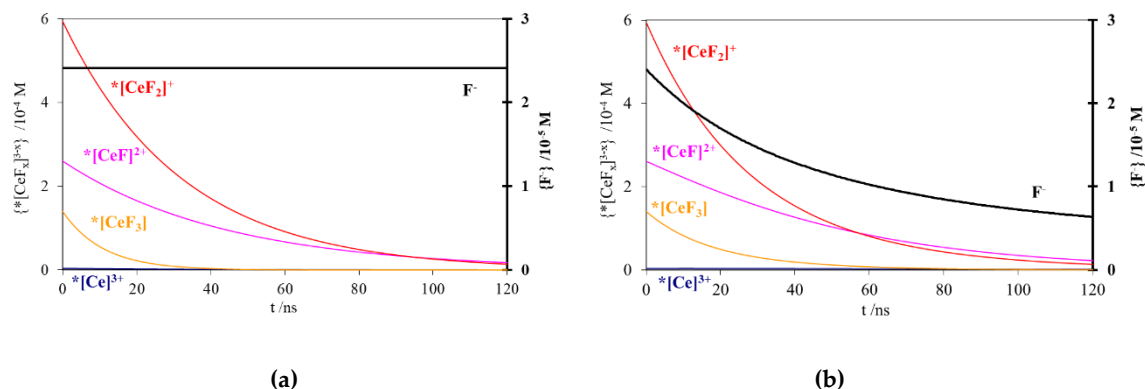

**Figure S2.** The change of the concentration of each species in the system ( $c(\text{Ce}^{3+})=1.0 \text{ mM}$  and  $c(\text{F}^-)=1.9 \text{ mM}$ ) during the 120-ns period after the laser excitation, due to the evaluation method assuming (a) slower or (b) faster equilibrium processes than the luminescence decay.  $[\text{CeF}_x(\text{H}_2\text{O})_{9-x}]^{3-x}$  is abbreviated as  $[\text{CeF}_x]^{3-x}$ .

In the case of the faster equilibrium processes, one may expect the same lifetime for each complex species, i.e., parallel decay curves. However, due to the stabilities of the excited-state complexes and the extremely high decay rate constants,  $^*[\text{CeF}_2(\text{H}_2\text{O})_7]^+$  disappears rather fast after the excitation (Fig. S2b), while the stability of the  $^*[\text{CeF}_3(\text{H}_2\text{O})_6]$  species increased (compared to the ground-state situation). Hence, its decay is much slower than that of  $^*[\text{CeF}_2(\text{H}_2\text{O})_7]^+$ , due to the continuous supply from the excited-state complex equilibrium. Also in this case, the decay of  $^*[\text{CeF}(\text{H}_2\text{O})_8]^{2+}$  is the slowest one.
